# Supplementary material for: The Effectiveness of Interventions Delivered Using Digital Food Environments to Encourage Healthy Food Choices: A Systematic Review and Meta-Analysis
Source: MDPI journal article supplement (doi:10.3390/nu13072255), 2021-06-30
Supplement: s1 [file s1]

**Table S2: Defining ‘healthy’ and ‘unhealthy’ food and beverages**

|                       | <b>Healthy</b>                                                                                         | <b>Unhealthy</b>                                                                                       |
|-----------------------|--------------------------------------------------------------------------------------------------------|--------------------------------------------------------------------------------------------------------|
| <b>Macronutrients</b> | Less energy                                                                                            | More energy                                                                                            |
|                       | Less total fat                                                                                         | More total fat                                                                                         |
|                       | Less saturated fat                                                                                     | More saturated fat                                                                                     |
|                       | Less cholesterol                                                                                       | More cholesterol                                                                                       |
|                       | Less added sugar                                                                                       | More added sugar                                                                                       |
|                       | More fibre                                                                                             | Less fibre                                                                                             |
| <b>Micronutrients</b> | Less sodium                                                                                            | More sodium                                                                                            |
| <b>Food groups</b>    | More wholegrains/cereals                                                                               | Less wholegrains/cereals                                                                               |
|                       | More vegetables                                                                                        | Less vegetables                                                                                        |
|                       | More fruit                                                                                             | Less fruit                                                                                             |
|                       | More lean meat/ poultry/ fish/ nuts/ seeds and legumes/beans                                           | Less lean meat/ poultry/ fish/ nuts/ seeds and legumes/beans                                           |
|                       | More low fat dairy                                                                                     | Less low fat dairy                                                                                     |
|                       | More water                                                                                             | Less water                                                                                             |
|                       | Less sugar sweetened drinks                                                                            | More sugar sweetened drinks                                                                            |
|                       | Less cake, biscuits, salted chips/crackers, lollies, chocolate, ice-cream, takeaway and processed meat | More cake, biscuits, salted chips/crackers, lollies, chocolate, ice-cream, takeaway and processed meat |
|                       | Less processed food                                                                                    | More processed food                                                                                    |
| <b>Diet quality</b>   | Higher diet quality/ nutrient scores                                                                   | Lower diet quality/ nutrient scores                                                                    |

\*Note: these definitions are based on National Healthy Eating Recommendations [1]; and other nutrition profiling criteria [2].

## References

1. Australian Government, National Health and Medical Research Council, and Department of Health and Ageing, *Australian Guide to Healthy Eating*, Department of Health and Ageing, Editor. 2017, Australian Government Department of Health: Canberra, Australia.
2. Lobstein, T. and S. Davies, *Defining and labelling ‘healthy’ and ‘unhealthy’ food*. Public Health Nutrition, 2009. **12**(3): p. 331-340.
