# Supplementary material for: The Effectiveness of Interventions Delivered Using Digital Food Environments to Encourage Healthy Food Choices: A Systematic Review and Meta-Analysis
Source: MDPI journal article supplement (doi:10.3390/nu13072255), 2021-06-30
Supplement: s1 [file s1]

Additional file 1: Table S1: Medline search strategy.

Database(s): **Ovid MEDLINE(R) Epub Ahead of Print, In-Process & Other Non-Indexed Citations, Ovid MEDLINE(R) Daily and Ovid MEDLINE(R) 1946 to September 29, 2020**

Search Strategy:

| #  | Searches                                                                     |
|----|------------------------------------------------------------------------------|
| 1  | (online or on-line).mp.                                                      |
| 2  | Online Systems/                                                              |
| 3  | Mobile applications/                                                         |
| 4  | ((Phone or mobile) adj app*).ti,ab,kw.                                       |
| 5  | Internet/                                                                    |
| 6  | (website or web page or web-based).mp.                                       |
| 7  | (cyber or virtual or digital or technolog* or software).mp.                  |
| 8  | ((mobile or cellular or cell or smart) adj (phone* or telephone*)).ti,ab,kw. |
| 9  | (e-health or eHealth or electronic health).ti,ab,kw.                         |
| 10 | Computers/                                                                   |
| 11 | User computer interface/                                                     |
| 12 | 1 or 2 or 3 or 4 or 5 or 6 or 7 or 8 or 9 or 10 or 11                        |
| 13 | Nutrition*.mp.                                                               |
| 14 | (health* adj2 eat*).mp.                                                      |
| 15 | Fruit/ or fruit*.mp.                                                         |
| 16 | Vegetables/ or vegetable*.mp.                                                |
| 17 | (canteen* or menu or cafeteria* or kiosk).mp.                                |
| 18 | Food service/                                                                |
| 19 | (calorie* or kiojoule*).mp.                                                  |
| 20 | Energy intake/                                                               |
| 21 | Energy density.mp.                                                           |
| 22 | Eating/                                                                      |
| 23 | Feeding behavior/ or feeding behaviour.mp.                                   |
| 24 | Nutrition* intake.mp.                                                        |
| 25 | Food habits/ or food/                                                        |
| 26 | Carbonated beverages/ or (soft drink* or soda or sweetened drink*).mp.       |
| 27 | Dietary fats/                                                                |
| 28 | Confectionary.mp.                                                            |
| 29 | (school adj2 (lunch* or meal* dinner*)).mp.                                  |
| 30 | (nutrition* adj2 program*).mp.                                               |

|    |                                                                                                                                                                                                                                                                                          |
|----|------------------------------------------------------------------------------------------------------------------------------------------------------------------------------------------------------------------------------------------------------------------------------------------|
| 31 | Exp diet/                                                                                                                                                                                                                                                                                |
| 32 | Diet*.ti,ab.                                                                                                                                                                                                                                                                             |
| 33 | Snacks/ or lunch/ or meals/ or breakfast/ or dinner.mp.                                                                                                                                                                                                                                  |
| 34 | 13 or 14 or 15 or 16 or 17 or 18 or 19 or 20 21 or 22 or 23 or 24 or 25 or 26 or 27 or 28 or 29 or 30 or 31 or 32 or 33                                                                                                                                                                  |
| 35 | (purcahs* or buy or buying or bought or sale*).mp.                                                                                                                                                                                                                                       |
| 36 | (order* or select*).ti,ab.                                                                                                                                                                                                                                                               |
| 37 | ((consumer? or shopping) adj2 (choice? or behavio*)).mp.                                                                                                                                                                                                                                 |
| 38 | (product? Adj3 (select* or choice*)).mp.                                                                                                                                                                                                                                                 |
| 39 | ((grocer* or food* or fruit? Or vegetable? Or dairy or fish or fat? Or salt? Or sugar? Or sweet* or calori* or canteen or menu or soda or drink or beverage or meal or cafeteria or snack or lunch or breakfast or diet*) adj2 (select* or order* or shop* or choice* or purchase*)).mp. |
| 40 | (choice\$ or retail or spend or transaction*).mp.                                                                                                                                                                                                                                        |
| 41 | 35 or 26 or 37 or 38 or 39 or 40                                                                                                                                                                                                                                                         |
| 42 | Randomized controlled trial/                                                                                                                                                                                                                                                             |
| 43 | Controlled clinical trial/                                                                                                                                                                                                                                                               |
| 44 | Randomi?ed.ti,ab.                                                                                                                                                                                                                                                                        |
| 45 | Randomly.ti,ab.                                                                                                                                                                                                                                                                          |
| 46 | Trial.ti,ab.                                                                                                                                                                                                                                                                             |
| 47 | Groups.ti,ab.                                                                                                                                                                                                                                                                            |
| 48 | 42 or 43 or 44 or 45 or 46 or 47                                                                                                                                                                                                                                                         |
| 49 | 12 and 34 and 41 and 48                                                                                                                                                                                                                                                                  |
